# Supplementary material
Source: Springer Nature journal article supplement (https://www.springermedizin.de/resource/supplementary/12943_2003_46_MOESM5_ESM.pdf/9553318)

BxPC-3

BxPC-3 rasV12

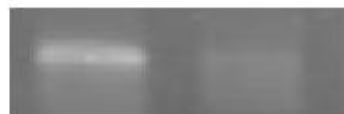

← p8

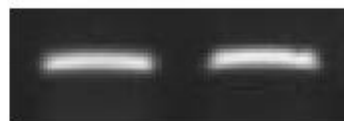

← RL3

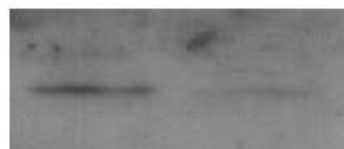

← p8

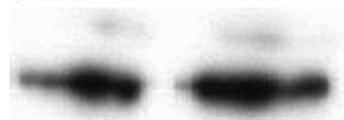

←  $\beta$ -tubulin

Supplement: MOESM5 [file 9553318]
